# Supplementary material
Source: publisher site journal article supplement (https://www.dovepress.com/article/487097)
Supplement: Supplementary file 1 [file get_supplementary_file.php]

**Supplement table 1. The clinical characteristics of the patients.**

| **Variables** | **Control participants**  **(n=17)** | **COPD patients**  **(n=11)** | ***p -***  **value** |
| --- | --- | --- | --- |
| Age (years) (Mean ± SD) | 57.4±10.7 | 55.9±16.7 | 0.790 |
| Sex, n (%) |  |  | 0.390 |
| Male | 8 (47.1) | 7 (63.6) |  |
| Female | 9 (52.9) | 4 (36.4) |  |
| BMI (kg/m2) (Mean ± SD) | 24.4±3.7 | 23.4±4.2 | 0.576 |
| Smoking (pack/year) (Median, IQR) | 5 (0, 30) | 30 (0, 45) | 0.483 |
| Pulmonary function (Mean ± SD) |  |  |  |
| FEV1 %pred | 95.5±16.3 | 70.3±15.0 | 0.003 |
| FEV1/FVC | 79.2±6.5 | 60.6±7.8 | <0.001 |

**Abbreviations:** BMI, Body mass index; COPD, Chronic obstructive pulmonary disease; FEV1, Forced expiratory volume in one second; FVC, Forced vital capacity; GOLD, Global Initiative for Chronic Obstructive Lung Disease; IQR, Interquartile range; SD, Standard deviation.
